# Supplementary material for: Synergistic Effect of Motivation for the Elderly and Support for Going out
Source: MDPI journal article supplement (doi:10.3390/jpm12081257), 2022-07-30
Supplement: s1 [file s1]

**Supplement table S2 Comparisons of changes in measurements at the last two points**

|                            | Choisoko use<br>(N=31) |                  | Non Choisoko use<br>(N=25) |                 | P-value |
|----------------------------|------------------------|------------------|----------------------------|-----------------|---------|
|                            | N                      |                  | N                          |                 |         |
| Grip strength (right)      | 28                     | -0.41 ± 2.36     | 17                         | -1.16 ± 2.51    | 0.329   |
| Grip strength (left)       | 28                     | -0.93 ± 1.50     | 17                         | -1.39 ± 1.72    | 0.361   |
| Grip strength max          | 28                     | -0.78 ± 1.94     | 17                         | -1.04 ± 2.33    | 0.702   |
| Stand up                   | 28                     | -0.84 ± 1.50     | 15                         | -1.34 ± 1.94    | 0.391   |
| Walk time                  | 28                     | -0.48 ± 0.90     | 16                         | -0.04 ± 1.45    | 0.287   |
| Walk speed                 | 28                     | 0.06 ± 0.12      | 16                         | 0.07 ± 0.12     | 0.891   |
| Walk time max              | 28                     | -0.42 ± 0.43     | 16                         | -0.24 ± 0.30    | 0.101   |
| Walk speed max             | 28                     | 0.12 ± 0.13      | 16                         | 0.08 ± 0.10     | 0.244   |
| Weight                     | 27                     | -0.49 ± 2.04     | 17                         | 0.27 ± 0.88     | 0.100   |
| BMI                        | 27                     | -0.25 ± 1.01     | 17                         | 0.12 ± 0.40     | 0.099   |
| Body fat                   | 27                     | -0.62 ± 2.78     | 17                         | 0.92 ± 2.06     | 0.042   |
| Muscle                     | 27                     | -0.10 ± 0.89     | 17                         | -0.26 ± 0.61    | 0.472   |
| Quadmus                    | 26                     | 0.00 ± 0.32      | 16                         | -0.09 ± 0.18    | 0.266   |
| Alb                        | 28                     | -0.03 ± 0.21     | 13                         | -0.05 ± 0.17    | 0.638   |
| GOT                        | 28                     | 0.68 ± 4.46      | 13                         | 0.00 ± 4.26     | 0.644   |
| GPT                        | 28                     | -0.86 ± 5.90     | 13                         | -0.77 ± 3.61    | 0.954   |
| BUN                        | 28                     | 1.66 ± 3.19      | 13                         | -2.52 ± 7.73    | 0.081   |
| CRE                        | 28                     | -0.02 ± 0.08     | 13                         | -0.04 ± 0.04    | 0.185   |
| eGFR                       | 28                     | 2.29 ± 7.14      | 13                         | 3.32 ± 3.22     | 0.528   |
| WBC                        | 28                     | -182.14 ± 910.86 | 13                         | 246.15 ± 638.51 | 0.092   |
| RBC                        | 28                     | 16.27 ± 79.15    | 13                         | -2.15 ± 13.09   | 0.241   |
| Hb                         | 28                     | -0.09 ± 0.54     | 13                         | -0.27 ± 0.40    | 0.236   |
| Ht                         | 28                     | 0.26 ± 1.93      | 13                         | -0.27 ± 1.53    | 0.354   |
| MCV                        | 28                     | -0.03 ± 2.10     | 13                         | -0.06 ± 1.47    | 0.954   |
| MCH                        | 28                     | -0.43 ± 0.78     | 13                         | -0.42 ± 0.61    | 0.993   |
| MCHC                       | 28                     | -0.44 ± 0.82     | 13                         | -0.48 ± 0.67    | 0.889   |
| Platelet                   | 28                     | -0.01 ± 1.89     | 13                         | 0.41 ± 1.90     | 0.514   |
| Total of basic check       | 28                     | -1.57 ± 2.59     | 17                         | -1.47 ± 2.43    | 0.896   |
| Volume of iliopsoas muscle | 26                     | 0.89 ± 3.14      | 19                         | 0.52 ± 3.10     | 0.697   |

Data are presented as mean ± standard deviation

Alb: albumin, AST: aspartate aminotransferase, ALT: alanine aminotransferase, BUN: blood urea

nitrogen, CRE: creatinine, eGFR: estimated glomerular filtration rate, WBC: White blood cell, RBC: Red blood cell, Hb: hemoglobin, Ht: hematocrit, MCV: mean corpuscular volume, MCH: mean corpuscular hemoglobin, MCHC: mean corpuscular hemoglobin concentration.
