# Supplementary material for: Synergistic Effect of Motivation for the Elderly and Support for Going out
Source: MDPI journal article supplement (doi:10.3390/jpm12081257), 2022-07-30
Supplement: s1 [file s1]

**Supplement table S1 Comparisons of changes in measurements at the first two points**

|                            | Choisoko use<br>(N=31) |                 | Non Choisoko use<br>(N=25) |                 |         |
|----------------------------|------------------------|-----------------|----------------------------|-----------------|---------|
|                            | N                      |                 | N                          |                 | P-value |
| Grip strength (right)      | 30                     | -0.67 ± 2.08    | 22                         | 0.14 ± 2.67     | 0.243   |
| Grip strength (left)       | 30                     | 0.11 ± 2.82     | 22                         | 0.79 ± 1.99     | 0.314   |
| Grip strength max          | 30                     | -0.32 ± 2.16    | 22                         | -0.11 ± 2.08    | 0.734   |
| Stand up                   | 30                     | -2.01 ± 2.55    | 20                         | -1.98 ± 2.85    | 0.967   |
| Walk time                  | 30                     | 0.06 ± 0.94     | 21                         | -0.38 ± 1.13    | 0.159   |
| Walk speed                 | 30                     | -0.01 ± 0.17    | 21                         | 0.04 ± 0.16     | 0.332   |
| Walk time max              | 30                     | 0.02 ± 0.42     | 21                         | -0.33 ± 0.59    | 0.026   |
| Walk speed max             | 30                     | -0.02 ± 0.14    | 21                         | 0.07 ± 0.12     | 0.019   |
| Weight                     | 28                     | 0.39 ± 0.66     | 21                         | 0.62 ± 1.95     | 0.603   |
| BMI                        | 28                     | 0.17 ± 0.30     | 21                         | 0.30 ± 0.93     | 0.566   |
| Body fat                   | 28                     | -0.64 ± 1.54    | 21                         | -0.14 ± 2.14    | 0.374   |
| Muscle                     | 28                     | 0.55 ± 0.74     | 21                         | 0.28 ± 0.78     | 0.221   |
| Quadmus                    | 28                     | 0.13 ± 0.29     | 22                         | 0.13 ± 0.18     | 0.999   |
| Alb                        | 30                     | 0.02 ± 0.18     | 20                         | 0.10 ± 0.20     | 0.207   |
| GOT                        | 30                     | -1.37 ± 4.70    | 20                         | 0.65 ± 3.01     | 0.071   |
| GPT                        | 30                     | -2.00 ± 5.30    | 20                         | 0.00 ± 2.34     | 0.076   |
| BUN                        | 30                     | 0.54 ± 3.31     | 20                         | 3.18 ± 6.45     | 0.103   |
| CRE                        | 30                     | 0.01 ± 0.07     | 20                         | 0.00 ± 0.05     | 0.719   |
| eGFR                       | 30                     | -0.18 ± 6.63    | 20                         | -0.35 ± 4.05    | 0.913   |
| WBC                        | 30                     | 450.00 ± 885.81 | 20                         | 155.00 ± 591.59 | 0.164   |
| RBC                        | 30                     | -12.98 ± 71.10  | 20                         | 26.12 ± 90.01   | 0.112   |
| Hb                         | 30                     | 0.07 ± 0.46     | 20                         | 0.17 ± 0.50     | 0.465   |
| Ht                         | 30                     | 0.06 ± 1.48     | 20                         | 0.66 ± 1.48     | 0.166   |
| MCV                        | 30                     | 0.25 ± 1.71     | 20                         | 0.39 ± 1.34     | 0.762   |
| MCH                        | 30                     | 0.20 ± 0.65     | 20                         | 0.01 ± 0.45     | 0.216   |
| MCHC                       | 30                     | 0.13 ± 0.70     | 20                         | -0.10 ± 0.49    | 0.175   |
| Platelet                   | 30                     | 0.35 ± 1.65     | 20                         | 0.50 ± 2.49     | 0.820   |
| Total of basic check       | 30                     | -2.27 ± 2.85    | 21                         | -1.10 ± 1.30    | 0.055   |
| Volume of iliopsoas muscle | 28                     | -0.06 ± 2.11    | 23                         | 0.25 ± 2.93     | 0.673   |

Data are presented as mean ± standard deviation

Alb: albumin, AST: aspartate aminotransferase, ALT: alanine aminotransferase, BUN: blood urea

nitrogen, CRE: creatinine, eGFR: estimated glomerular filtration rate, WBC: White blood cell, RBC: Red blood cell, Hb: hemoglobin, Ht: hematocrit, MCV: mean corpuscular volume, MCH: mean corpuscular hemoglobin, MCHC: mean corpuscular hemoglobin concentration.
