# Supplementary material for: Synergistic Effect of Motivation for the Elderly and Support for Going out
Source: MDPI journal article supplement (doi:10.3390/jpm12081257), 2022-07-30
Supplement: s1 [file s1]

## Distribution of FIM total scores

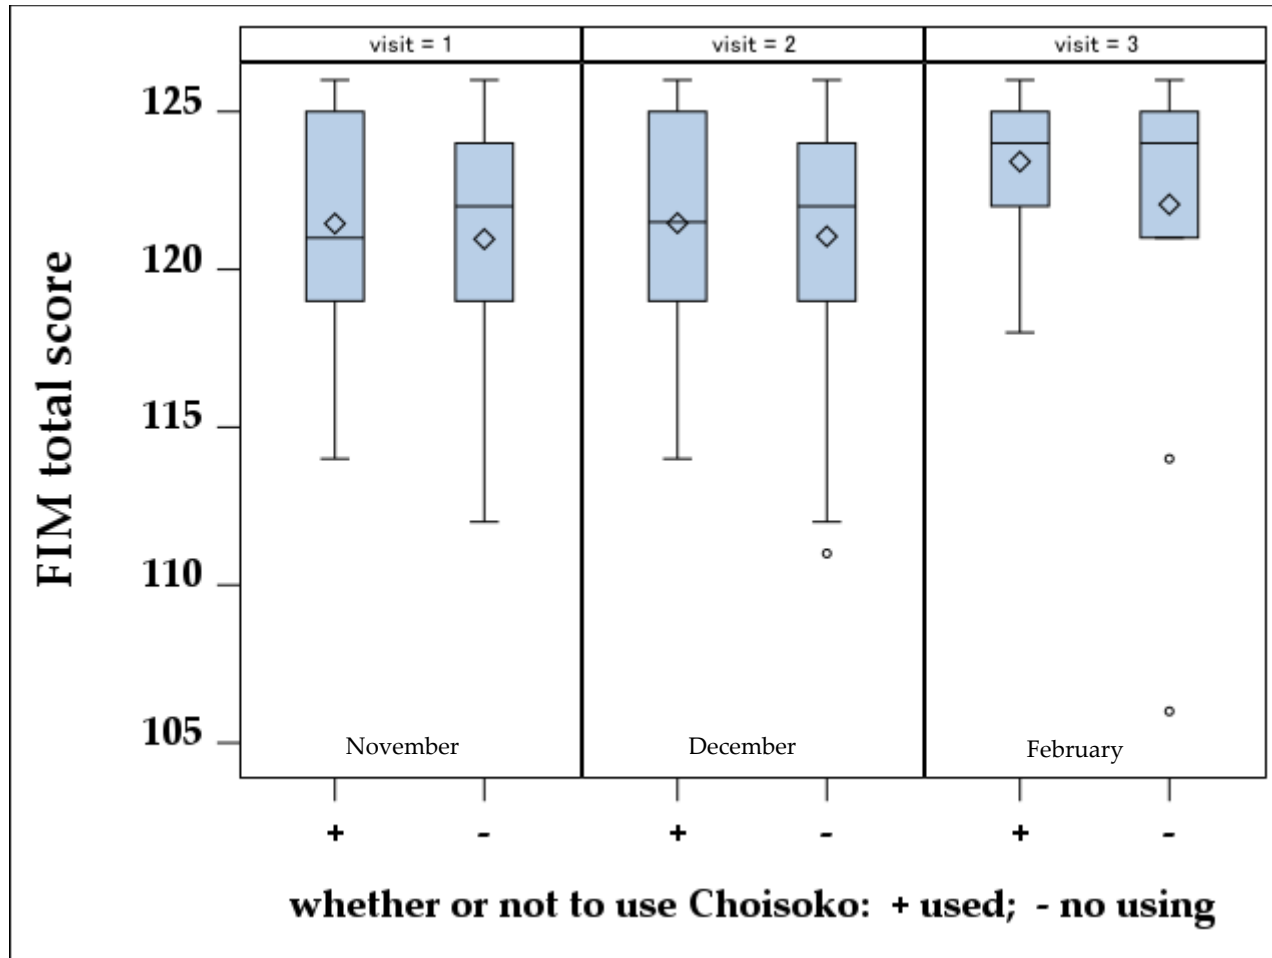

**Supplement figure S1:** Among the subjects who used the Choisoko system, those with low FIM scores in December showed an improvement in FIM scores in February.
