# Supplementary material for: Synergistic Effect of Motivation for the Elderly and Support for Going out
Source: MDPI journal article supplement (doi:10.3390/jpm12081257), 2022-07-30
Supplement: s1 [file s1]

**Supplement Table S3 Comparisons of FIM score changes at the first two points**

|                        |    | Choisoko use<br>(N=31) |    | Non Choisoko use<br>(N=25) |                                        | P-value |
|------------------------|----|------------------------|----|----------------------------|----------------------------------------|---------|
| Change of<br>FIM score | N  | Mean<br>±SD            | N  | Mean<br>±SD                | Difference<br>(95%CI)                  |         |
| Total score            | 30 | “U+2212”0.03±0.18      | 22 | “U+2212”0.05±0.49          | 0.01<br>(“U+2212”0.21 to 0.24)         | 0.912   |
| Exercise<br>score      | 30 | “U+2212”0.07±0.37      | 22 | “U+2212”0.09±0.43          | 0.02<br>(“U+2212”0.20 to 0.25)         | 0.831   |
| Cognitive<br>score     | 30 | 0.03±0.41              | 22 | 0.05±0.21                  | “U+2212”0.01<br>(“U+2212”0.19 to 0.17) | 0.891   |

SD: Standard deviation    CI: Confidence Interval
